# Supplementary material
Source: PubMed Central journal article supplement (PMC2442323)
Supplement: M800900200_1.pdf [file M800900200_1.pdf]

*Properties of subunit a substitutions*

| Location and Mutation  | Growth on glucose <sup>a</sup> | Growth on succinate <sup>b</sup><br><i>mm</i> | % Quenching with ATP <sup>c</sup> | +Ag/-Ag <sup>d</sup> | +NEM/-NEM <sup>d</sup> |
|------------------------|--------------------------------|-----------------------------------------------|-----------------------------------|----------------------|------------------------|
| WT <sup>d</sup>        | 100                            | 2.0 - 2.8                                     | 65-85                             | 0.80-1.00            | 0.90-1.00              |
| <b><i>TMH 1</i></b>    |                                |                                               |                                   |                      |                        |
| W39C                   | 102                            | 2.3                                           | 78 ± 1                            | 0.79 ± 0.03          | 0.92 ± 0.00            |
| T40C                   | 102                            | 2.6                                           | 78 ± 0                            | 0.89 ± 0.01          | 0.94 ± 0.01            |
| I41C                   | 103                            | 2.3                                           | 76 ± 1                            | 0.86 ± 0.02          | 0.95 ± 0.08            |
| N42C                   | 93                             | 2.2                                           | 68 ± 3                            | 0.86 ± 0.00          | 1.00 ± 0.08            |
| I43C                   | 93                             | 2.4                                           | 65 ± 5                            | 0.93 ± 0.03          | 0.98 ± 0.02            |
| D44C                   | 93                             | 2.0                                           | 45 ± 3                            | 0.26 ± 0.03          | 0.33 ± 0.04            |
| S45C                   | 100                            | 2.2                                           | 68 ± 9                            | 0.90 ± 0.06          | 1.03 ± 0.01            |
| M46C                   | 101                            | 2.4                                           | 70 ± 6                            | 0.99 ± 0.00          | 1.01 ± 0.05            |
| F47C                   | 101                            | 2.2                                           | 68 ± 8                            | 1.01 ± 0.04          | 1.02 ± 0.08            |
| F48C                   | 100                            | 2.2                                           | 71 ± 3                            | 0.98 ± 0.02          | 0.93 ± 0.03            |
| S49C                   | 100                            | 2.4                                           | 71 ± 1                            | 0.99 ± 0.07          | 1.02 ± 0.11            |
| V50C                   | 99                             | 2.2                                           | 69 ± 9                            | 0.87 ± 0.15          | 0.98 ± 0.18            |
| V51C                   | 100                            | 2.0                                           | 79 ± 8                            | 0.96 ± 0.02          | 0.97 ± 0.02            |
| L52C                   | 98                             | 2.3                                           | 70 ± 6                            | 0.92 ± 0.00          | 0.97 ± 0.06            |
| G53C                   | 100                            | 2.7                                           | 69 ± 12                           | 0.94 ± 0.10          | 1.02 ± 0.17            |
| L54C                   | 99                             | 2.0                                           | 55 ± 0                            | 1.00 ± 0.03          | 1.02 ± 0.09            |
| L55C                   | 99                             | 2.0                                           | 67 ± 8                            | 0.88 ± 0.02          | 0.96 ± 0.08            |
| F56C                   | 100                            | 2.1                                           | 58 ± 2                            | 0.99 ± 0.02          | 1.07 ± 0.04            |
| L57C                   | 100                            | 2.2                                           | 68 ± 10                           | 0.93 ± 0.15          | 0.98 ± 0.12            |
| V58C                   | 97                             | 2.2                                           | 58 ± 2                            | 0.90 ± 0.10          | 1.01 ± 0.10            |
| L59C                   | 98                             | 2.2                                           | 65 ± 12                           | 0.89 ± 0.07          | 1.01 ± 0.14            |
| F60C                   | 97                             | 2.2                                           | 62 ± 8                            | 0.91 ± 0.09          | 0.91 ± 0.06            |
| R61C                   | 99                             | 2.2                                           | 66 ± 1                            | 0.97 ± 0.00          | 0.94 ± 0.03            |
| S62C                   | 102                            | 2.5                                           | 78 ± 1                            | 0.91 ± 0.01          | 0.96 ± 0.03            |
| <b><i>1-2 loop</i></b> |                                |                                               |                                   |                      |                        |
| V63C                   | 101                            | 2.0                                           | 85 ± 1                            | 1.00 ± 0.01          | 0.98 ± 0.00            |
| A64C                   | 100                            | 2.2                                           | 82 ± 0                            | 0.96 ± 0.00          | 0.96 ± 0.00            |
| K65C                   | 107                            | 2.2                                           | 80 ± 2                            | 1.01 ± 0.02          | 0.98 ± 0.04            |
| K66C                   | 105                            | 2.2                                           | 71 ± 2                            | 0.93 ± 0.04          | 0.91 ± 0.02            |
| A67C                   | 100                            | 2.0                                           | 77 ± 1                            | 0.99 ± 0.02          | 1.00 ± 0.01            |

|       |     |     |        |             |             |
|-------|-----|-----|--------|-------------|-------------|
| T68C  | 104 | 2.0 | 80 ± 0 | 1.01 ± 0.01 | 0.97 ± 0.01 |
| S69C  | 100 | 2.0 | 73 ± 4 | 1.11 ± 0.08 | 1.08 ± 0.07 |
| G70C  | 101 | 2.1 | 67 ± 3 | 0.98 ± 0.03 | 0.95 ± 0.06 |
| V71C  | 99  | 2.1 | 71 ± 4 | 1.05 ± 0.03 | 1.03 ± 0.01 |
| P72C  | 101 | 2.0 | 70 ± 6 | 0.90 ± 0.02 | 0.90 ± 0.08 |
| G73C  | 108 | 2.0 | 73 ± 3 | 0.98 ± 0.05 | 0.99 ± 0.00 |
| K74C  | 100 | 2.2 | 84 ± 0 | 1.01 ± 0.01 | 0.98 ± 0.00 |
| F75C  | 105 | 2.0 | 70 ± 7 | 0.99 ± 0.06 | 0.93 ± 0.04 |
| Q76C  | 107 | 2.0 | 84 ± 1 | 1.00 ± 0.01 | 0.97 ± 0.01 |
| T77C  | 103 | 2.0 | 69 ± 7 | 0.95 ± 0.04 | 0.97 ± 0.05 |
| A78C  | 103 | 2.0 | 70 ± 5 | 1.00 ± 0.03 | 0.98 ± 0.06 |
| I79C  | 101 | 2.0 | 68 ± 4 | 0.90 ± 0.01 | 0.95 ± 0.00 |
| E80C  | 99  | 2.0 | 84 ± 1 | 1.00 ± 0.02 | 0.97 ± 0.00 |
| L81C  | 111 | 2.0 | 75 ± 4 | 0.87 ± 0.04 | 0.99 ± 0.04 |
| V82C  | 99  | 1.9 | 70 ± 5 | 0.93 ± 0.04 | 0.86 ± 0.06 |
| I83C  | 108 | 2.0 | 75 ± 3 | 0.95 ± 0.01 | 1.00 ± 0.05 |
| G84C  | 102 | 1.8 | 66 ± 3 | 0.62 ± 0.06 | 0.87 ± 0.01 |
| F85C  | 108 | 2.0 | 74 ± 1 | 0.87 ± 0.06 | 0.91 ± 0.05 |
| V86C  | 102 | 2.0 | 68 ± 2 | 0.17 ± 0.03 | 0.91 ± 0.04 |
| N87C  | 112 | 2.0 | 76 ± 1 | 0.93 ± 0.04 | 0.97 ± 0.03 |
| G88C  | 104 | 2.0 | 71 ± 1 | 0.87 ± 0.10 | 0.98 ± 0.05 |
| S89C  | 99  | 2.3 | 71 ± 2 | 0.93 ± 0.00 | 0.92 ± 0.06 |
| V90C  | 102 | 2.3 | 68 ± 5 | 0.47 ± 0.04 | 0.94 ± 0.00 |
| K91C  | 98  | 2.0 | 71 ± 2 | 0.86 ± 0.01 | 0.97 ± 0.03 |
| D92C  | 105 | 2.1 | 66 ± 4 | 0.79 ± 0.07 | 1.00 ± 0.03 |
| M93C  | 105 | 2.0 | 67 ± 3 | 0.12 ± 0.00 | 0.88 ± 0.04 |
| Y94C  | 100 | 2.1 | 70 ± 3 | 0.84 ± 0.00 | 0.93 ± 0.08 |
| H95C  | 103 | 2.2 | 67 ± 6 | 0.93 ± 0.04 | 0.87 ± 0.03 |
| G96C  | 112 | 2.6 | 77 ± 1 | 0.84 ± 0.02 | 0.90 ± 0.01 |
| K97C  | 100 | 2.1 | 78 ± 3 | 0.92 ± 0.05 | 0.94 ± 0.03 |
| S98C  | 100 | 2.2 | 76 ± 2 | 0.89 ± 0.05 | 0.95 ± 0.02 |
| K99C  | 111 | 2.4 | 76 ± 2 | 0.95 ± 0.03 | 0.95 ± 0.01 |
| L100C | 100 | 2.2 | 73 ± 3 | 0.90 ± 0.04 | 0.93 ± 0.03 |
| I101C | 100 | 2.4 | 76 ± 1 | 0.57 ± 0.06 | 0.96 ± 0.02 |
| A102C | 105 | 2.4 | 74 ± 2 | 0.94 ± 0.03 | 0.98 ± 0.01 |

**TMH 2**

|       |     |     |        |             |             |
|-------|-----|-----|--------|-------------|-------------|
| P103C | 99  | 2.4 | 74 ± 2 | 0.84 ± 0.06 | 0.98 ± 0.02 |
| L104C | 100 | 2.4 | 74 ± 2 | 0.83 ± 0.01 | 0.97 ± 0.01 |
| A105C | 100 | 2.4 | 72 ± 1 | 0.81 ± 0.04 | 0.98 ± 0.03 |
| L106C | 102 | 2.1 | 77 ± 0 | 0.58 ± 0.04 | 0.96 ± 0.04 |
| T107C | 101 | 2.1 | 72 ± 3 | 0.86 ± 0.04 | 0.98 ± 0.04 |
| E108C | 99  | 2.2 | 75 ± 2 | 0.98 ± 0.01 | 0.99 ± 0.01 |
| F109C | 100 | 2.1 | 74 ± 0 | 0.96 ± 0.01 | 1.00 ± 0.04 |
| V110C | 100 | 2.1 | 63 ± 2 | 0.86 ± 0.04 | 0.97 ± 0.01 |
| W111C | 103 | 2.1 | 65 ± 3 | 0.76 ± 0.04 | 0.97 ± 0.01 |
| V112C | 98  | 2.1 | 63 ± 1 | 0.65 ± 0.09 | 0.99 ± 0.01 |
| F113C | 103 | 2.1 | 63 ± 1 | 0.77 ± 0.08 | 0.98 ± 0.01 |
| L114C | 108 | 2.0 | 78 ± 1 | 0.90 ± 0.01 | 0.98 ± 0.02 |
| M115C | 100 | 2.1 | 66 ± 3 | 0.25 ± 0.07 | 0.96 ± 0.05 |
| N116C | 104 | 2.1 | 64 ± 2 | 0.17 ± 0.05 | 0.98 ± 0.02 |
| L117C | 98  | 2.1 | 80 ± 0 | 0.95 ± 0.01 | 1.00 ± 0.01 |
| M118C | 104 | 2.3 | 75 ± 1 | 0.82 ± 0.03 | 0.99 ± 0.01 |
| D119C | 82  | 1.6 | 36 ± 2 | 0.07 ± 0.01 | 0.82 ± 0.05 |
| L120C | 96  | 2.0 | 64 ± 3 | 0.08 ± 0.01 | 0.97 ± 0.02 |
| L121C | 100 | 2.0 | 78 ± 1 | 0.78 ± 0.01 | 0.97 ± 0.01 |
| P122C | 106 | 2.0 | 69 ± 6 | 0.21 ± 0.02 | 0.98 ± 0.03 |
| E123C | 96  | 2.1 | 74 ± 2 | 0.84 ± 0.04 | 0.99 ± 0.02 |
| D124C | 109 | 2.0 | 75 ± 4 | 0.65 ± 0.03 | 0.95 ± 0.02 |

**2-3 loop**

|       |     |     |        |             |             |
|-------|-----|-----|--------|-------------|-------------|
| L125C | 109 | 2.1 | 70 ± 2 | 0.52 ± 0.02 | 0.99 ± 0.03 |
| L126C | 99  | 2.0 | 61 ± 3 | 0.22 ± 0.02 | 0.99 ± 0.05 |
| P127C | 95  | 2.0 | 76 ± 1 | 0.57 ± 0.03 | 0.97 ± 0.03 |
| Y128C | 99  | 2.3 | 73 ± 5 | 0.81 ± 0.03 | 0.97 ± 0.01 |
| I129C | 100 | 2.4 | 73 ± 2 | 0.87 ± 0.05 | 0.97 ± 0.00 |
| A130C | 100 | 2.4 | 71 ± 2 | 0.48 ± 0.07 | 0.98 ± 0.03 |
| E131C | 100 | 2.5 | 69 ± 1 | 0.84 ± 0.01 | 0.96 ± 0.03 |
| H132C | 99  | 2.1 | 74 ± 6 | 0.83 ± 0.05 | 0.97 ± 0.02 |
| V133C | 99  | 2.3 | 71 ± 4 | 0.88 ± 0.06 | 0.97 ± 0.01 |
| L134C | 106 | 2.1 | 70 ± 3 | 0.88 ± 0.04 | 1.00 ± 0.01 |
| G135C | 100 | 2.2 | 59 ± 3 | 0.77 ± 0.06 | 0.91 ± 0.09 |
| L136C | 113 | 2.4 | 54 ± 4 | 0.44 ± 0.02 | 0.93 ± 0.15 |

|                        |     |     |        |             |             |
|------------------------|-----|-----|--------|-------------|-------------|
| P137C                  | 100 | 2.1 | 64 ± 4 | 0.77 ± 0.01 | 0.91 ± 0.07 |
| A138C                  | 101 | 2.0 | 74 ± 1 | 0.87 ± 0.03 | 0.96 ± 0.01 |
| <b><i>TMH 3</i></b>    |     |     |        |             |             |
| L139C                  | 97  | 2.5 | 65     | 0.69        | 0.98        |
| R140C                  | 99  | 2.0 | 69 ± 6 | 0.39 ± 0.05 | 0.93 ± 0.04 |
| V141C                  | 100 | 1.5 | 77 ± 9 | 0.76 ± 0.04 | 0.87 ± 0.12 |
| V142C                  | 100 | 2.5 | 74 ± 3 | 0.79 ± 0.02 | 0.96 ± 0.05 |
| P143C                  | 101 | 2.5 | 69 ± 3 | 0.79 ± 0.01 | 0.96 ± 0.06 |
| S144C                  | 101 | 2.4 | 72 ± 5 | 0.24 ± 0.08 | 0.96 ± 0.02 |
| A145C                  | 101 | 2.3 | 70 ± 3 | 0.71 ± 0.12 | 0.96 ± 0.04 |
| D146C                  | 96  | 2.0 | 70 ± 3 | 0.44 ± 0.01 | 0.33 ± 0.06 |
| V147C                  | 90  | 2.0 | 70 ± 2 | 0.80 ± 0.03 | 1.00 ± 0.02 |
| N148C                  | 99  | 2.0 | 70 ± 2 | 0.81 ± 0.06 | 0.97 ± 0.02 |
| V149C                  | 99  | 2.3 | 73 ± 1 | 0.89 ± 0.03 | 0.97 ± 0.01 |
| T150C                  | 102 | 2.5 | 68 ± 4 | 0.89 ± 0.03 | 0.99 ± 0.01 |
| L151C                  | 101 | 2.5 | 71 ± 0 | 0.87 ± 0.03 | 0.96 ± 0.06 |
| S152C                  | 101 | 2.3 | 71 ± 1 | 0.93 ± 0.01 | 1.00 ± 0.06 |
| M153C                  | 101 | 2.4 | 68 ± 4 | 0.90 ± 0.04 | 0.95 ± 0.01 |
| A154C                  | 100 | 2.5 | 69 ± 1 | 0.93 ± 0.02 | 0.97 ± 0.02 |
| L155C                  | 100 | 2.3 | 60 ± 4 | 0.82 ± 0.03 | 0.89 ± 0.01 |
| G156C                  | 100 | 2.3 | 67 ± 6 | 0.90 ± 0.06 | 0.95 ± 0.03 |
| V157C                  | 101 | 2.4 | 72 ± 1 | 0.90 ± 0.03 | 0.96 ± 0.04 |
| F158C                  | 101 | 2.2 | 69 ± 2 | 0.72 ± 0.09 | 0.97 ± 0.01 |
| <b><i>3-4 loop</i></b> |     |     |        |             |             |
| I159C                  | 101 | 2.2 | 69 ± 4 | 0.93 ± 0.03 | 0.97 ± 0.00 |
| L160C                  | 100 | 2.3 | 64 ± 2 | 0.97 ± 0.17 | 1.04 ± 0.05 |
| I161C                  | 99  | 2.3 | 70 ± 4 | 0.55 ± 0.16 | 1.00 ± 0.00 |
| L162C                  | 99  | 2.2 | 67 ± 2 | 0.59 ± 0.14 | 1.01 ± 0.08 |
| F163C                  | 99  | 2.2 | 69 ± 8 | 0.88 ± 0.00 | 1.00 ± 0.09 |
| Y164C                  | 88  | 2.0 | 74 ± 4 | 0.80 ± 0.05 | 0.91 ± 0.05 |
| S165C                  | 99  | 2.1 | 69 ± 7 | 0.51 ± 0.10 | 0.95 ± 0.00 |
| I166C                  | 100 | 2.2 | 73 ± 0 | 0.75 ± 0.06 | 0.94 ± 0.06 |
| K167C                  | 99  | 2.1 | 74 ± 1 | 0.85 ± 0.06 | 0.94 ± 0.08 |
| M168C                  | 99  | 2.4 | 70 ± 5 | 0.96 ± 0.03 | 0.97 ± 0.05 |
| K169C                  | 99  | 2.3 | 70 ± 5 | 0.90 ± 0.10 | 0.94 ± 0.04 |
| G170C                  | 99  | 2.5 | 73 ± 3 | 0.78 ± 0.05 | 0.94 ± 0.03 |

|              |     |     |         |             |             |
|--------------|-----|-----|---------|-------------|-------------|
| I171C        | 100 | 2.6 | 47 ± 6  | 1.19 ± 0.01 | 1.43 ± 0.11 |
| G172C        | 100 | 2.1 | 69 ± 4  | 0.97 ± 0.07 | 1.07 ± 0.03 |
| G173C        | 101 | 2.6 | 69 ± 3  | 0.83 ± 0.01 | 0.91 ± 0.04 |
| F174C        | 101 | 2.4 | 55 ± 16 | 0.68 ± 0.12 | 1.09 ± 0.30 |
| T175C        | 100 | 2.3 | 73 ± 5  | 0.76 ± 0.04 | 0.97 ± 0.03 |
| K176C        | 100 | 2.3 | 70 ± 1  | 0.90 ± 0.09 | 0.99 ± 0.02 |
| E177C        | 100 | 2.1 | 58 ± 14 | 0.85 ± 0.26 | 1.09 ± 0.15 |
| L178C        | 99  | 2.5 | 68 ± 3  | 0.61 ± 0.05 | 0.96 ± 0.04 |
| T179C        | 99  | 2.4 | 70 ± 0  | 0.24 ± 0.01 | 0.96 ± 0.01 |
| L180C        | 100 | 2.3 | 75 ± 4  | 0.90 ± 0.05 | 0.97 ± 0.01 |
| Q181C        | 100 | 2.1 | 73 ± 0  | 0.79 ± 0.12 | 0.92 ± 0.04 |
| P182C        | 98  | 2.2 | 59 ± 5  | 0.67 ± 0.31 | 0.74 ± 0.22 |
| F183C        | 99  | 2.2 | 74 ± 1  | 0.69 ± 0.24 | 0.75 ± 0.21 |
| N184C        | 99  | 2.4 | 75 ± 0  | 0.75 ± 0.05 | 0.84 ± 0.00 |
| H185C        | 104 | 2.3 | 68 ± 1  | 0.85 ± 0.10 | 0.92 ± 0.12 |
| W186C        | 100 | 2.7 | 65 ± 3  | 0.96 ± 0.06 | 0.98 ± 0.02 |
| A187C        | 101 | 2.7 | 65 ± 3  | 0.88 ± 0.07 | 0.98 ± 0.04 |
| F188C        | 100 | 2.7 | 64 ± 0  | 0.74 ± 0.17 | 0.97 ± 0.04 |
| I189C        | 101 | 2.3 | 64 ± 0  | 0.55 ± 0.12 | 0.96 ± 0.08 |
| P190C        | 101 | 2.5 | 69 ± 4  | 0.48 ± 0.02 | 0.93 ± 0.10 |
| V191C        | 106 | 2.5 | 63 ± 5  | 0.36 ± 0.02 | 0.98 ± 0.07 |
| N192C        | 99  | 1.9 | 42 ± 3  | 0.33 ± 0.00 | 0.92 ± 0.04 |
| L193C        | 91  | 2.2 | 70 ± 8  | 0.37 ± 0.08 | 0.99 ± 0.09 |
| I194C        | 95  | 2.2 | 67 ± 5  | 0.27 ± 0.01 | 1.02 ± 0.06 |
| L195C        | 94  | 2.1 | 59 ± 3  | 0.06 ± 0.01 | 0.95 ± 0.20 |
| E196C        | 89  | 2.0 | 73 ± 8  | 0.18 ± 0.01 | 0.92 ± 0.08 |
| G197C        | 97  | 2.2 | 75 ± 6  | 0.67 ± 0.03 | 0.96 ± 0.01 |
| V198C        | 92  | 2.2 | 74 ± 5  | 0.11 ± 0.06 | 0.96 ± 0.03 |
| S199C        | 99  | 2.3 | 71 ± 3  | 0.13 ± 0.01 | 0.97 ± 0.05 |
| L200C        | 99  | 2.2 | 72 ± 3  | 0.83 ± 0.03 | 0.96 ± 0.04 |
| L201C        | 99  | 2.0 | 73 ± 1  | 0.42 ± 0.08 | 0.96 ± 0.03 |
| S202C        | 97  | 2.2 | 69 ± 1  | 0.06 ± 0.00 | 0.89 ± 0.09 |
| <b>TMH 4</b> |     |     |         |             |             |
| K203C        | 97  | 2.1 | 67 ± 2  | 0.03 ± 0.03 | 0.91 ± 0.05 |
| P204C        | 97  | 2.0 | 70 ± 2  | 0.56 ± 0.10 | 0.96 ± 0.04 |
| V205C        | 99  | 2.1 | 68 ± 3  | 0.67 ± 0.06 | 0.97 ± 0.02 |

|                 |     |     |         |             |             |
|-----------------|-----|-----|---------|-------------|-------------|
| S206C           | 103 | 2.5 | 73 ± 3  | 0.05 ± 0.03 | 0.13 ± 0.02 |
| L207C           | 83  | 1.5 | 35 ± 9  | 0.27 ± 0.07 | 0.67 ± 0.09 |
| G208C           | 107 | 1.5 | 81 ± 4  | 0.92 ± 0.12 | 0.96 ± 0.02 |
| L209C           | 99  | 3.1 | 41 ± 8  | 0.60 ± 0.06 | 1.02 ± 0.05 |
| R210C           | 50  | 0   | 3 ± 2   | --          | --          |
| L211C           | 107 | 2.8 | 69 ± 10 | 0.93 ± 0.11 | 0.97 ± 0.17 |
| F212C           | 99  | 2.5 | 74 ± 14 | 0.99 ± 0.02 | 0.99 ± 0.27 |
| G213C           | 67  | 1.2 | 9 ± 2   | 0.24 ± 0.20 | 1.02 ± 0.26 |
| N214C           | 99  | 2.1 | 52 ± 11 | 0.09 ± 0.04 | 0.18 ± 0.05 |
| M215C           | 102 | 1.8 | 73 ± 2  | 0.05 ± 0.01 | 0.95 ± 0.16 |
| Y216C           | 102 | 2.0 | 39 ± 2  | 0.50 ± 0.06 | 1.33 ± 0.29 |
| A217C           | 104 | 2.6 | 71 ± 22 | 0.48 ± 0.05 | 1.18 ± 0.23 |
| G218C           | 93  | 2.6 | 42 ± 2  | 0.16 ± 0.09 | 1.17 ± 0.23 |
| E219C           | 63  | 0.2 | 26 ± 3  | 0.32 ± 0.06 | 1.02 ± 0.14 |
| L220C           | 93  | 2.1 | 42 ± 17 | 0.36 ± 0.09 | 1.31 ± 0.20 |
| I221C           | 102 | 2.8 | 75 ± 7  | 0.71 ± 0.09 | 1.04 ± 0.03 |
| F222C           | 107 | 2.5 | 71 ± 2  | 0.63 ± 0.03 | 1.02 ± 0.03 |
| I223C           | 104 | 2.9 | 67 ± 5  | 0.74 ± 0.24 | 1.02 ± 0.11 |
| L224C           | 102 | 2.7 | 58 ± 14 | 0.76 ± 0.04 | 0.97 ± 0.27 |
| <b>4-5 loop</b> |     |     |         |             |             |
| I225C           | 99  | 2.1 | 71 ± 5  | 0.81 ± 0.06 | 0.90 ± 0.05 |
| A226C           | 100 | 2.1 | 72 ± 2  | 0.70 ± 0.08 | 0.95 ± 0.01 |
| G227C           | 102 | 2.1 | 65 ± 5  | 0.84 ± 0.09 | 0.98 ± 0.10 |
| L228C           | 100 | 2.2 | 73 ± 5  | 0.74 ± 0.08 | 0.94 ± 0.03 |
| L229C           | 98  | 2.1 | 74 ± 5  | 0.83 ± 0.07 | 0.96 ± 0.03 |
| P230C           | 96  | 2.1 | 64 ± 3  | 0.72 ± 0.02 | 0.94 ± 0.02 |
| W231C           | 100 | 2.1 | 71 ± 3  | 0.86 ± 0.03 | 0.95 ± 0.06 |
| W232C           | 73  | 2.1 | 67 ± 6  | 0.81 ± 0.08 | 0.93 ± 0.04 |
| S233C           | 100 | 2.0 | 72 ± 2  | 0.81 ± 0.14 | 0.96 ± 0.02 |
| Q234C           | 107 | 2.2 | 73 ± 5  | 0.84 ± 0.10 | 0.98 ± 0.02 |
| W235C           | 105 | 2.0 | 77 ± 0  | 0.87 ± 0.01 | 0.99 ± 0.01 |
| I236C           | 100 | 2.0 | 80 ± 1  | 0.97 ± 0.02 | 0.98 ± 0.00 |
| L237C           | 107 | 2.1 | 69 ± 6  | 0.91 ± 0.05 | 0.96 ± 0.02 |
| N238C           | 100 | 2.0 | 74 ± 1  | 0.94 ± 0.02 | 0.92 ± 0.05 |

**TMH 5**

|                   |     |     |        |             |             |
|-------------------|-----|-----|--------|-------------|-------------|
| V239C             | 99  | 2.2 | 73 ± 1 | 0.92 ± 0.04 | 0.95 ± 0.01 |
| P240C             | 100 | 2.2 | 78 ± 1 | 0.93 ± 0.02 | 0.97 ± 0.01 |
| W241C             | 103 | 2.1 | 72 ± 1 | 0.40 ± 0.05 | 0.92 ± 0.06 |
| A242C             | 99  | 2.0 | 74 ± 2 | 0.70 ± 0.07 | 0.96 ± 0.01 |
| I243C             | 113 | 2.1 | 75 ± 2 | 0.87 ± 0.05 | 0.97 ± 0.01 |
| F244C             | 104 | 2.1 | 62 ± 3 | 0.35 ± 0.03 | 1.02 ± 0.04 |
| D119H/H245C       | 94  | 1.9 | 71 ± 7 | 0.56 ± 0.01 | 1.04 ± 0.12 |
| I246C             | 98  | 2.2 | 71 ± 2 | 0.79 ± 0.07 | 0.92 ± 0.10 |
| L247C             | 104 | 2.1 | 77 ± 1 | 0.57 ± 0.01 | 0.97 ± 0.02 |
| I248C             | 102 | 2.1 | 70 ± 5 | 0.18 ± 0.04 | 0.62 ± 0.09 |
| I249C             | 97  | 2.0 | 74 ± 1 | 0.07 ± 0.03 | 1.00 ± 0.02 |
| T250C             | 98  | 2.0 | 75 ± 3 | 0.86 ± 0.03 | 0.95 ± 0.05 |
| L251C             | 99  | 2.1 | 62 ± 4 | 0.20 ± 0.02 | 0.90 ± 0.06 |
| Q252C             | 91  | 1.8 | 30 ± 2 | 0.09 ± 0.01 | 0.74 ± 0.06 |
| A253C             | 100 | 2.1 | 78 ± 3 | 0.93 ± 0.05 | 0.98 ± 0.02 |
| F254C             | 108 | 2.2 | 71 ± 4 | 0.89 ± 0.06 | 0.98 ± 0.06 |
| I255C             | 98  | 2.2 | 73 ± 3 | 0.80 ± 0.07 | 0.99 ± 0.04 |
| P256C             | 111 | 2.2 | 73 ± 3 | 0.94 ± 0.00 | 1.00 ± 0.04 |
| M257C             | 100 | 2.0 | 75 ± 4 | 0.91 ± 0.10 | 0.98 ± 0.08 |
| V258C             | 101 | 2.0 | 75 ± 5 | 0.83 ± 0.03 | 0.98 ± 0.05 |
| L259C             | 100 | 2.0 | 71 ± 6 | 0.87 ± 0.01 | 0.96 ± 0.02 |
| T260C             | 101 | 2.5 | 73 ± 3 | 0.99 ± 0.01 | 0.99 ± 0.00 |
| <b>C-terminus</b> |     |     |        |             |             |
| I261C             | 111 | 2.0 | 71 ± 4 | 0.75 ± 0.04 | 0.98 ± 0.01 |
| V262C             | 111 | 2.2 | 70 ± 3 | 0.28 ± 0.02 | 0.25 ± 0.02 |
| Y263C             | 99  | 2.2 | 67 ± 3 | 0.11 ± 0.00 | 0.76 ± 0.03 |
| L264C             | 100 | 2.0 | 75 ± 8 | 0.43 ± 0.02 | 0.96 ± 0.03 |
| S265C             | 113 | 2.2 | 73 ± 9 | 0.95 ± 0.05 | 0.96 ± 0.01 |
| M266C             | 101 | 2.2 | 82 ± 1 | 0.58 ± 0.01 | 0.97 ± 0.01 |
| A267C             | 100 | 2.1 | 75 ± 3 | 0.91 ± 0.15 | 0.87 ± 0.09 |
| S268C             | 108 | 2.3 | 80 ± 1 | 0.97 ± 0.02 | 0.99 ± 0.01 |
| E269C             | 109 | 2.2 | 75 ± 3 | 0.85 ± 0.07 | 0.98 ± 0.04 |
| E270C             | 106 | 2.2 | 64 ± 1 | 0.65 ± 0.02 | 0.94 ± 0.02 |
| <i>Δunc</i>       | 55  | 0   |        |             |             |

---

<sup>a</sup> Yield in liquid minimal media containing 0.04% glucose, expressed as a percentage of growth relative to the cysteine-less control.

<sup>b</sup> Colony size after incubation for 72 h on minimal medium plates containing 22 mM succinate. Colonies from the cysteine-less control strain show average colony sizes of  $2.4 \pm 0.3$  mm.

<sup>c</sup> Measured in a buffer containing 10 mM HEPES-KOH pH 7.5, 1 mM  $\text{Mg}(\text{NO}_3)_2$ , 10 mM  $\text{KNO}_3$ .

<sup>d</sup> The results presented are the average of two or more determinations  $\pm$  S.D. The most silver sensitive residues are highlighted in color: **red** (>85% inhibition) and **orange** (66-85% inhibition).
